# Supplementary material
Source: publisher figshare collection journal article supplement (https://karger.figshare.com/ndownloader/files/31002955)
Supplement: Supplementary file 1 [file 31002955]

**Supporting Information**

Table S1: SquameScan analysis (mean values per treatment)

| **Sample** | **Absorption [%]** |
| --- | --- |
| verum | 9.24 ± 3.21 |
| untreated | 12.88 ± 3.61 |
| vehicle | 10.60 ± 2.94 |

Table S2: Variability of suction blister size and volume

| **Suction blister roofs** | **Diameter [mm]** |
| --- | --- |
| Mean average per treatment: verum | 6,77 +/- 0.47 |
| Mean average per treatment: untreated | 6.52 +/- 0.46 |
| Mean average per treatment: vehicle | 6,7 +/- 0.47 |
|  |  |
| Smallest roof diameter in the study | 5.6 |
| largest roof diameter in the study | 7.0 |
|  |  |
| **Suction blister fluid** | **Volume [µL]** |
| Mean average liquid volume per treatment: verum | 59 +/- 27 |
| Mean average liquid volume per treatment: untreated | 49 +/- 19 |
| Mean average liquid volume per treatment: vehicle | 59 +/- 26 |
|  |  |
| Smallest volume in the study | 8 |
| Largest volume in the study | 110 |
